# Supplementary material for: Ni–reduced graphene oxide composite cathodes with new hierarchical morphologies for electrocatalytic hydrogen generation in alkaline media
Source: Royal Society of Chemistry journal article supplement (doi:10.1039/c6ra24993k), 2017-01-01
Supplement: c6ra24993k1.pdf [file c6ra24993k1.pdf]

## Supporting Information

### **Ni-reduced graphene oxide composite cathodes with new hierarchical morphologies for electrocatalytic hydrogen generation in alkaline media**

**Zhouhao Chen<sup>a, b, 1</sup>, Lixin Wang<sup>a, b, 1</sup>, Zhipeng Ma<sup>a</sup>, Jianjun Song<sup>a</sup>, Guangjie Shao<sup>a, b, \*</sup>**

<sup>a</sup> Hebei Key Laboratory of Applied Chemistry, College of Environmental and Chemical Engineering, Yanshan University, Qinhuangdao 066004, China

<sup>b</sup> State Key Laboratory of Metastable Materials Science and Technology, Yanshan University, Qinhuangdao 066004, China

\*Corresponding author. College of Environmental and Chemical Engineering, Qinhuangdao 066004, China

Tel. /fax: +86 335 8061569. E-mail address: shaoguangjie@ysu.edu.cn (G.J. Shao)

<sup>1</sup> Z. Chen and L. Wang contributed equally to this work.

#### **1. Synthesis of graphene oxide (GO)**

GO was prepared from natural graphite powder using a modified Hummers method.<sup>1</sup> 1.5 g KNO<sub>3</sub> was dissolved in a beaker containing 50 mL of 98% H<sub>2</sub>SO<sub>4</sub> placed in an ice-water bath below 5 °C. Then, 1 g graphite powder was added into the mixture with stirring. After 10 min, 8 g KMnO<sub>4</sub> was slowly added to the mixture and was stirred for another 6 h in a water bath at 35 °C. After that, 200 mL of water was slowly added into the solution over a period of 15 min. Subsequently, the temperature of the mixture was heated to 80 °C and kept for 30 min before cooling down naturally. Finally, 200 mL of water and 20 mL of 30wt % H<sub>2</sub>O<sub>2</sub> were added into the mixture to stop the reaction. The diluted mixture was washed in succession five times with 20 mL of water and 30 mL of 37wt % HCl. Then, the mixture was washed with

water several times until  $\text{pH} > 6$  by centrifugation to remove the unreacted graphite, the last one time with alcohol by ultrasonication for 2 h. Finally, the resulting mixture was vacuum-dried at  $40\text{ }^{\circ}\text{C}$  for further use.

## 2. Characterization of graphene oxide (GO)

The morphology of the prepared GO is characterized by TEM and the image is shown in Fig. S1(a). The GO exhibits a typical wrinkled sheet-like feature with the size about  $3\text{-}4\text{ }\mu\text{m}$ . The inset XRD pattern of GO shows only one diffraction peak at  $9.74^{\circ}$  corresponding to an increased layer distance of  $0.91\text{ nm}$  according to the Bragg's law, which is ascribed to the introduction of oxygen functional groups as well as water molecules in the interlayer of GO sheets.<sup>2, 3</sup> AFM was performed to investigate the thickness of the prepared GO sheets, the image and the measured result are shown in Fig. S1(b) and (c) respectively. It can be seen clearly from Fig. S1(c) that the thickness of GO sheets is ca.  $1.0\text{ nm}$ , indicating single layer GO sheets were obtained. Fig. S1(d) presents the FT-IR spectrum of the prepared GO. The spectrum exhibits a number of adsorption peaks assigned to the functional groups appear in GO, corresponding to the stretching vibrations of O-H from hydroxyls and trapped water molecules ( $3430\text{ cm}^{-1}$ ), C=O from carbonyl or carboxyl groups ( $1720\text{ cm}^{-1}$ ), C=C from  $\text{sp}^2$  graphite ring ( $1634\text{ cm}^{-1}$ ), O-H from phenol ( $1380\text{ cm}^{-1}$ ), C-OH ( $1228\text{ cm}^{-1}$ ) and C-O from carboxyl ( $1045\text{ cm}^{-1}$ ) respectively.<sup>4, 5</sup>

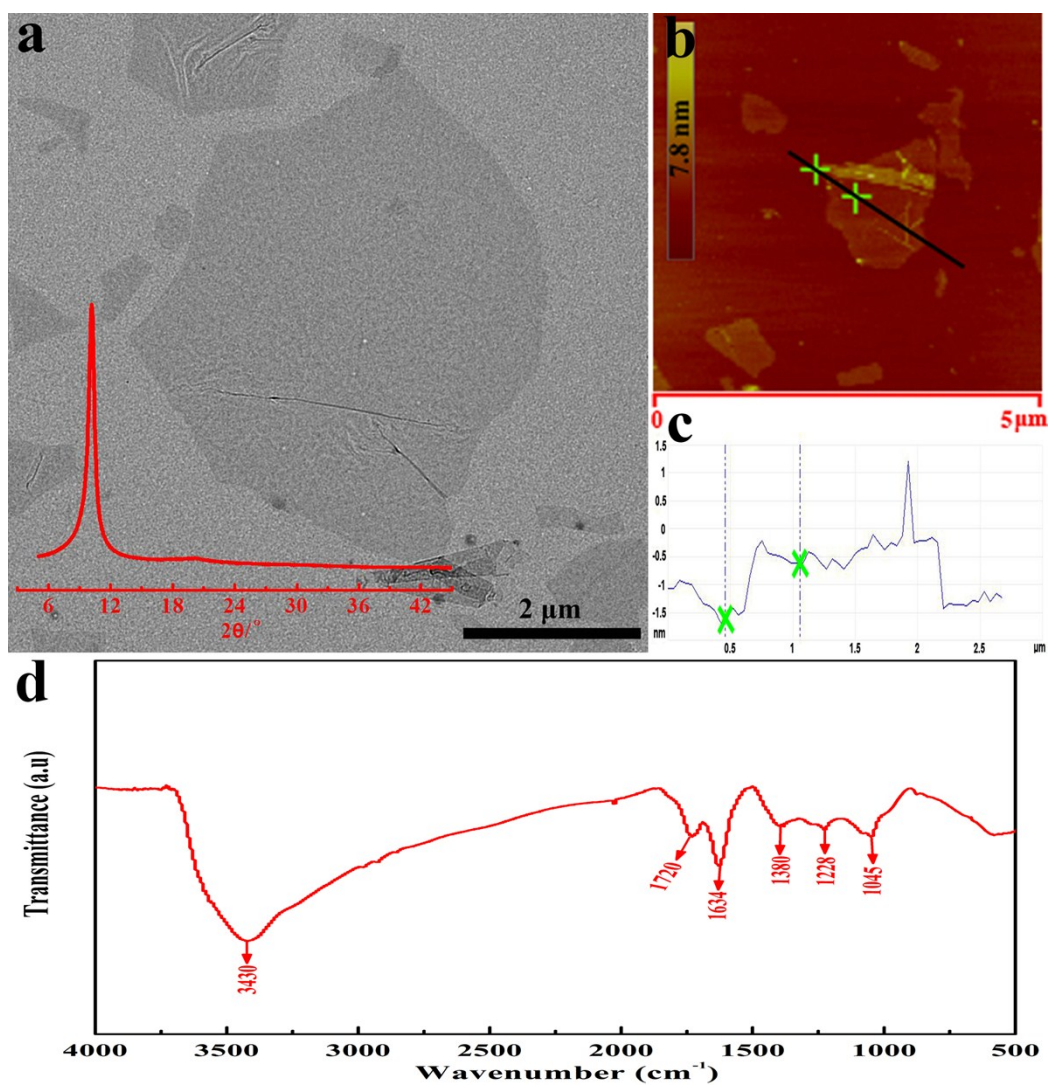

**Figure S1.** (a) TEM image of the prepared GO. (b) AFM image of the prepared GO. (c) AFM result of the thickness for the prepared GO. (d) FT-IR spectrum of the prepared GO.

**Table S1.** HER electrochemical parameters for some Ni-based electrocatalysts.

| Catalyst                                              | Method               | Electrolyte | T (°C) | $j_0$ (mA cm <sup>-2</sup> ) | b (mV dec <sup>-1</sup> ) | Ref.#      |
|-------------------------------------------------------|----------------------|-------------|--------|------------------------------|---------------------------|------------|
| Ni-rGO <sup>a</sup>                                   | electrodeposition    | 1M NaOH     | 25     | 0.741                        | 120                       | This paper |
| Ni-CeO <sub>2</sub>                                   | electrodeposition    | 1M NaOH     | 25     | 0.338                        | 147                       | 6          |
| Ni-CNT                                                | electrodeposition    | 1M NaOH     | 25     | 0.824                        | 135                       | 7          |
| Ni-Graphene                                           | electrodeposition    | 0.1M KOH    | 25     | 1.430                        | 348                       | 8          |
| Ni-P-WO <sub>3</sub>                                  | electroless plating  | 32% NaOH    | 30     | 6.943×10 <sup>-5</sup>       | 108                       | 9          |
| Ni <sub>71</sub> Mo <sub>10</sub> B <sub>19</sub>     | melt spinning        | 1M KOH      | 25     | 0.0162                       | 120                       | 10         |
| Fe-Ni-Graphene                                        | electrodeposition    | 6M NaOH     | 25     | 0.133                        | 125                       | 11         |
| NiMn                                                  | electrodeposition    | 30% NaOH    | 25     | 0.600                        | 130                       | 12         |
| Ni <sub>60</sub> Fe <sub>30</sub> Cr <sub>10</sub>    | ball milling         | 1M NaOH     | 25     | 0.134                        | 102                       | 13         |
| nanocrystalline Ni                                    | magnetron sputtering | 1M NaOH     | 25     | 0.307                        | 173                       | 14         |
| Ni-P+Fe <sub>2</sub> O <sub>3</sub> -TiO <sub>2</sub> | electroless plating  | 32% NaOH    | 30     | 6.02×10 <sup>-6</sup>        | 121                       | 15         |
| rGO-Ni foam                                           | electrophoretic      | 1M KOH      | 22     | 1.04                         | 130                       | 16         |

<sup>a</sup> Electrodeposited under supergravity field (N= 3000 rpm).

**Table S2.** Electrical equivalent circuit parameters obtained by fitting EIS data.

| GO concentration (g L <sup>-1</sup> ) | N value (rpm) | R <sub>s</sub> (Ω cm <sup>-2</sup> ) | R <sub>ct</sub> (Ω cm <sup>-2</sup> ) | R <sub>p</sub> (Ω cm <sup>-2</sup> ) | Q (mΩ <sup>-1</sup> s <sup>n</sup> cm <sup>-2</sup> ) |
|---------------------------------------|---------------|--------------------------------------|---------------------------------------|--------------------------------------|-------------------------------------------------------|
| 0                                     | 3000          | 3.17                                 | 475.9                                 | 1083                                 | 0.481                                                 |
| 0.1                                   | 3000          | 3.08                                 | 9.86                                  | 3.28                                 | 14.91                                                 |
| 0.4                                   | 3000          | 3.05                                 | 6.48                                  | 2.65                                 | 24.31                                                 |
| 0.7                                   | normal        | 2.88                                 | 37.39                                 | 8.49                                 | 5.028                                                 |
| 0.7                                   | 2500          | 2.83                                 | 12.82                                 | 4.00                                 | 13.31                                                 |
| 0.7                                   | 2750          | 2.98                                 | 9.21                                  | 3.19                                 | 19.69                                                 |
| 0.7                                   | 3000          | 2.89                                 | 5.47                                  | 1.48                                 | 40.09                                                 |
| 0.7                                   | 3250          | 2.98                                 | 6.66                                  | 3.15                                 | 20.85                                                 |
| 0.7                                   | 3500          | 3.06                                 | 8.59                                  | 2.60                                 | 18.98                                                 |
| 1.0                                   | 3000          | 2.95                                 | 6.08                                  | 1.73                                 | 20.94                                                 |
| 1.5                                   | 3000          | 3.03                                 | 6.95                                  | 2.90                                 | 18.22                                                 |

## REFERENCES

1. W. S. Hummers Jr and R. E. Offeman, *Journal of the American Chemical Society*, 1958, **80**, 1339-1339.
2. S. Park, J. An, J. R. Potts, A. Velamakanni, S. Murali and R. S. Ruoff, *Carbon*, 2011, **49**, 3019-3023.
3. Z.-g. Wang, P.-j. Li, Y.-f. Chen, J.-r. He, B.-j. Zheng, J.-b. Liu and F. Qi, *Materials Letters*, 2014, **116**, 416-419.
4. C. P. Kumar, T. Venkatesha and R. Shabadi, *Materials Research Bulletin*, 2013, **48**, 1477-1483.
5. M. H. Sadhir, M. Saranya, M. Aravind, A. Srinivasan, A. Siddharthan and N. Rajendran, *Applied Surface Science*, 2014, **320**, 171-176.
6. Z. Chen, Z. Ma, J. Song, L. Wang and G. Shao, *RSC Advances*, 2016, **6**, 60806-60814.
7. Z. Chen, Z. Ma, J. Song, L. Wang and G. Shao, *Journal of Power Sources*, 2016, **324**, 86-96.
8. Y.-g. Huang, H.-l. Fan, Z.-k. Chen, C.-b. Gu, M.-x. Sun, H.-q. Wang and Q.-y. Li, *International Journal of Hydrogen Energy*, 2016, **41**, 3786-3793.
9. S. Shibli, V. Anupama, P. Arun, P. Jineesh and L. Suji, *International Journal of Hydrogen Energy*, 2016.
10. T. Rauscher, C. I. Müller, A. Schmidt, B. Kieback and L. Röntzsch, *International Journal of Hydrogen Energy*, 2016, **41**, 2165-2176.
11. S. Badrayyana, D. K. Bhat, S. Shenoy, Y. Ullal and A. C. Hegde, *International Journal of Hydrogen Energy*, 2015, **40**, 10453-10462.
12. A. O. Yüce, A. Döner and G. Kardaş, *International Journal of Hydrogen Energy*, 2013, **38**, 4466-4473.
13. F. Rosalbino, G. Scavino and M. A. Grande, *Journal of Electroanalytical Chemistry*, 2013, **694**, 114-121.
14. Z. Grubač, M. Metikoš-Huković and R. Babić, *International Journal of Hydrogen Energy*, 2013, **38**, 4437-4444.
15. S. Shibli and J. Sebeelamol, *International Journal of Hydrogen Energy*, 2013, **38**, 2271-2282.
16. D. Chanda, J. Hnát, A. S. Dobrota, I. A. Pašti, M. Paidar and K. Bouzek, *Physical Chemistry Chemical Physics*, 2015, **17**, 342-350.
